# Supplementary material
Source: bioRxiv or medRxiv preprint supplement (https://www.biorxiv.org/highwire/filestream/35469/field_highwire_adjunct_files/10/077701-6.pdf)
Supplement: Supplementary file [file 077701-6.pdf]

# BRCA

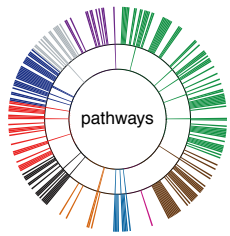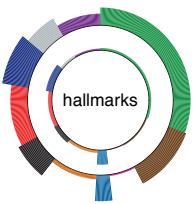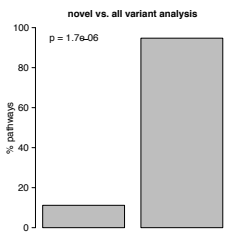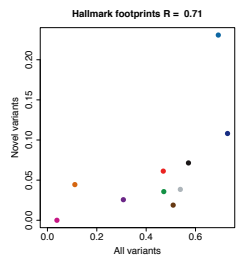

# GBM

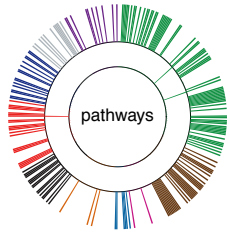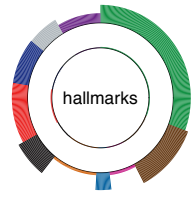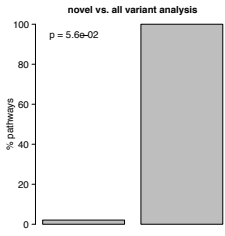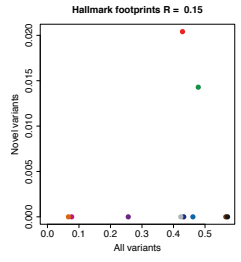

# KIRC

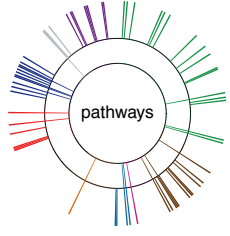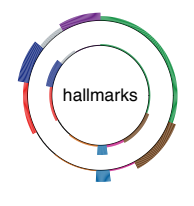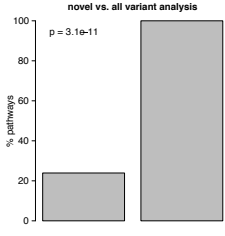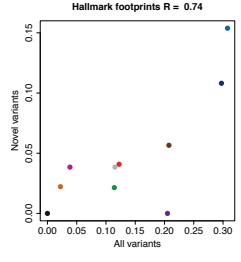

# PRAD

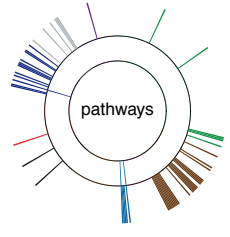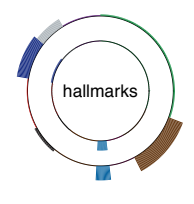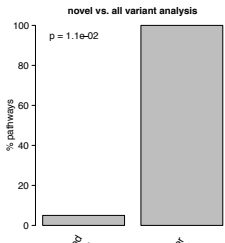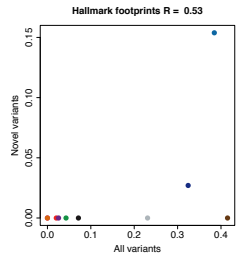

Missing  
enrichments  
(MA)

MA over  
total # of  
enrichments
